# Supplementary material for: Phosphorylation of starch by reactive extrusion
Source: Royal Society of Chemistry journal article supplement (doi:10.1039/d3cy00370a), 2001-01-01
Supplement: d3cy00370a1.pdf [file d3cy00370a1.pdf]

Supplementary material

|                                                                                                |    |
|------------------------------------------------------------------------------------------------|----|
| <b>Table S1:</b> Textural properties of catalysts, based on N <sub>2</sub> physisorption ..... | 2  |
| <b>Table S2:</b> XPS data for Pt/C and PtSn <sub>2</sub> C .....                               | 3  |
| <b>Figure S1:</b> N <sub>2</sub> physisorption isotherms .....                                 | 2  |
| <b>Figure S2:</b> NH <sub>3</sub> temperature programmed desorption.....                       | 3  |
| <b>Figure S3:</b> Simplified diagram of reactor set-ups .....                                  | 4  |
| <b>Figure S4:</b> <sup>1</sup> H-NMR spectrum of partially dehydrogenated n-tetradecane .....  | 6  |
| <b>Figure S5:</b> Gas phase FTIR spectra .....                                                 | 8  |
| <b>Figure S6:</b> Typical gas chromatogram of partially dehydrogenated tetradecane .....       | 9  |
| <b>Figure S7:</b> Typical GC-MS chromatogram of partially dehydrogenated tetradecane.....      | 10 |
| <b>Figure S8:</b> MS spectra of relevant compounds.....                                        | 11 |

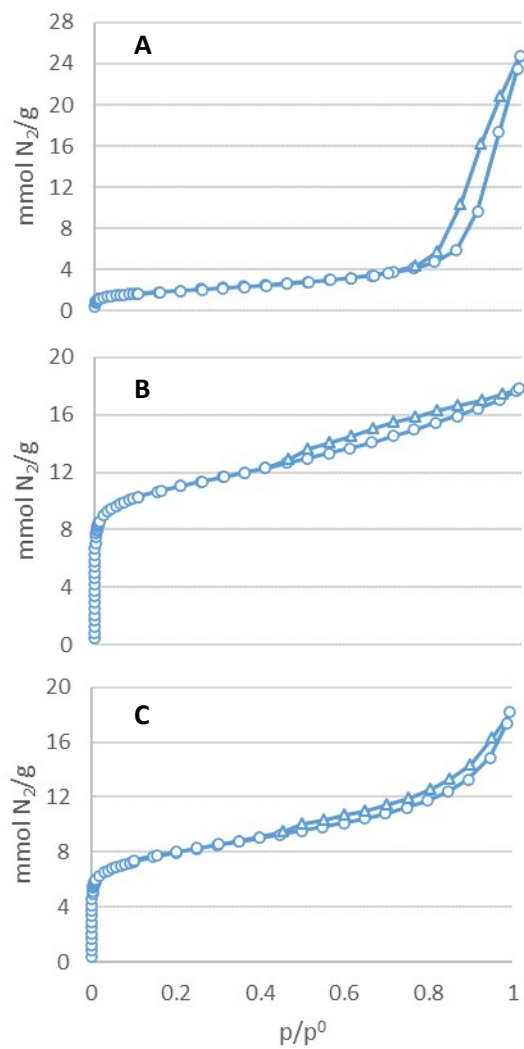

**Figure S1:**  $N_2$  physisorption isotherms for A) 5 wt%  $Pt/Al_2O_3$ ; B) 5 wt%  $Pt/C$ ; C) 5 wt%  $PtSn_2/C$ . o: adsorption;  $\Delta$ : desorption

**Table S1:** Textural properties of catalysts, based on  $N_2$  physisorption

| Catalyst                          | Surface Area <sup>a</sup><br>( $m^2/g$ ) | Pore volume <sup>b</sup><br>( $cm^3/g$ ) | Average pore diameter <sup>b</sup><br>(nm) |
|-----------------------------------|------------------------------------------|------------------------------------------|--------------------------------------------|
| Pt/C                              | 796                                      | 0.35                                     | 4.8                                        |
| PtSn <sub>2</sub> /C              | 581                                      | 0.45                                     | 7.3                                        |
| Pt/Al <sub>2</sub> O <sub>3</sub> | 154                                      | 0.81                                     | 21.4                                       |

<sup>a</sup>Based on BET method

<sup>b</sup>Based on BJH method



**Table S2:** XPS data for Pt/C and PtSn<sub>2</sub>C

| Pt/C                                     | Binding energy (eV) | FWHM (eV) | Concentration (at. %) |
|------------------------------------------|---------------------|-----------|-----------------------|
| C 1s                                     | 284.5 ± 0.1         | 3.1 ± 0.2 | 91.8 ± 1.0            |
| Na 1s                                    | 1071.5 ± 0.1        | 2.8 ± 0.1 | 0.6 ± 0.2             |
| O 1s                                     | 532.7 ± 0.3         | 4.2 ± 0.3 | 6.4 ± 1.2             |
| Pt 4f <sub>5/2</sub> (Pt(0))             | 74.2 ± 0.0          | 1.1 ± 0.0 | 0.5 ± 0.0             |
| Pt 4f <sub>7/2</sub> (Pt(0))             | 70.9 ± 0.0          | 1.1 ± 0.0 | 0.7 ± 0.0             |
| PtSn <sub>2</sub> /C                     |                     |           |                       |
| C 1s                                     | 284.6 ± 0.2         | 3.1 ± 0.1 | 83.6 ± 12.3           |
| Cl 2p                                    | 199.7 ± 0.4         | 3.6 ± 1.0 | 0.1 ± 0.1             |
| O 1s                                     | 532.4 ± 0.4         | 4.1 ± 0.1 | 6.7 ± 3.1             |
| Pt 4f <sub>5/2</sub> (Pt(0))             | 74.5 ± 0.0          | 1.2 ± 0.0 | 0.2 ± 0.0             |
| Pt 4f <sub>7/2</sub> (Pt(0))             | 71.2 ± 0.0          | 1.2 ± 0.0 | 0.2 ± 0.0             |
| Sn 3d <sub>3/2</sub> (SnO)               | 494.6 ± 0.0         | 1.5 ± 0.0 | 0.1 ± 0.0             |
| Sn 3d <sub>5/2</sub> (SnO)               | 486.1 ± 0.0         | 1.5 ± 0.0 | 0.2 ± 0.0             |
| Sn 3d <sub>3/2</sub> (SnO <sub>2</sub> ) | 495.8 ± 0.0         | 1.5 ± 0.0 | 0.4 ± 0.1             |
| Sn 3d <sub>5/2</sub> (SnO <sub>2</sub> ) | 487.4 ± 0.0         | 1.5 ± 0.0 | 0.5 ± 0.1             |

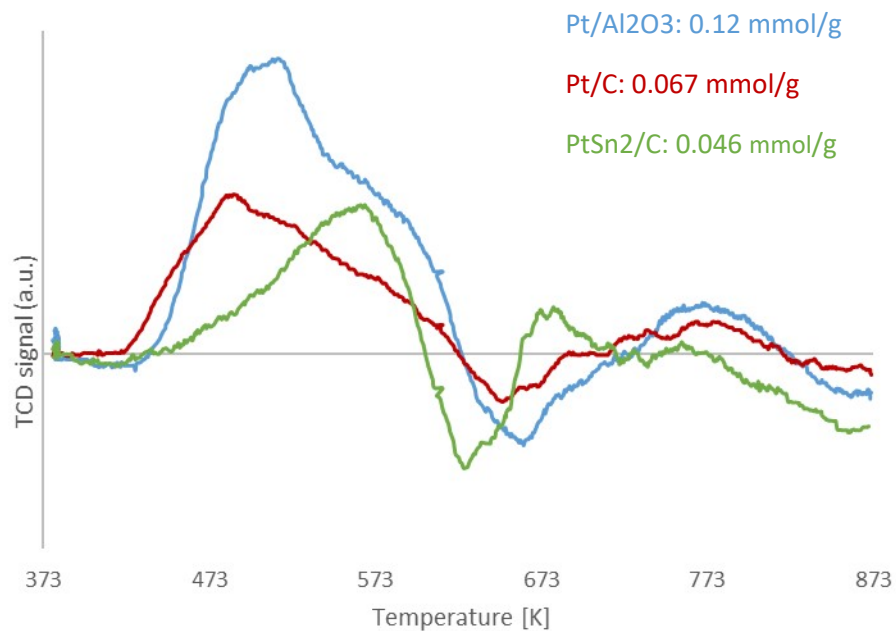

**Figure S2:** NH<sub>3</sub> temperature programmed desorption for Pt/Al<sub>2</sub>O<sub>3</sub>, Pt/C, PtSn<sub>2</sub>/C between 373K and 873K

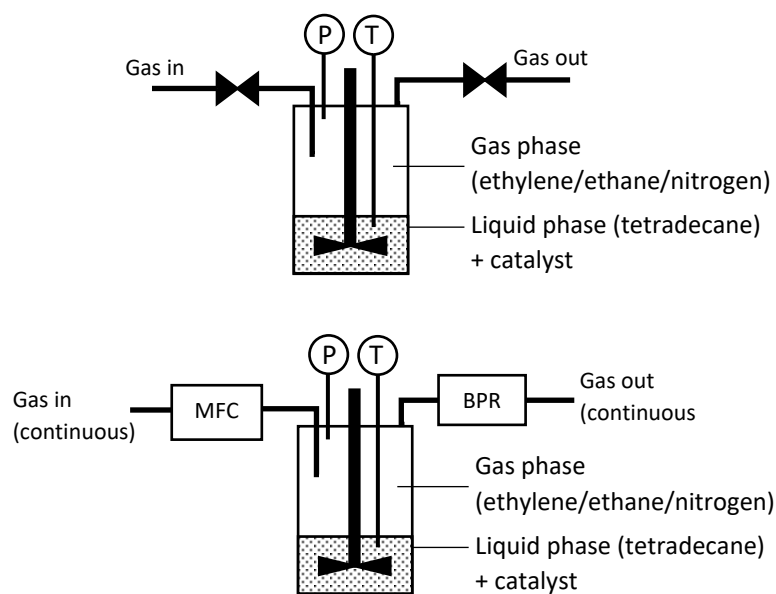

**Figure S3:** Simplified diagram of reactor set-ups for batch and continuous ethylene addition. P: digital pressure sensor; T: thermocouple; MFC: mass flow controller (0.06-1 ml<sub>n</sub>/min); BPR: back-pressure regulator (0-2 barg)

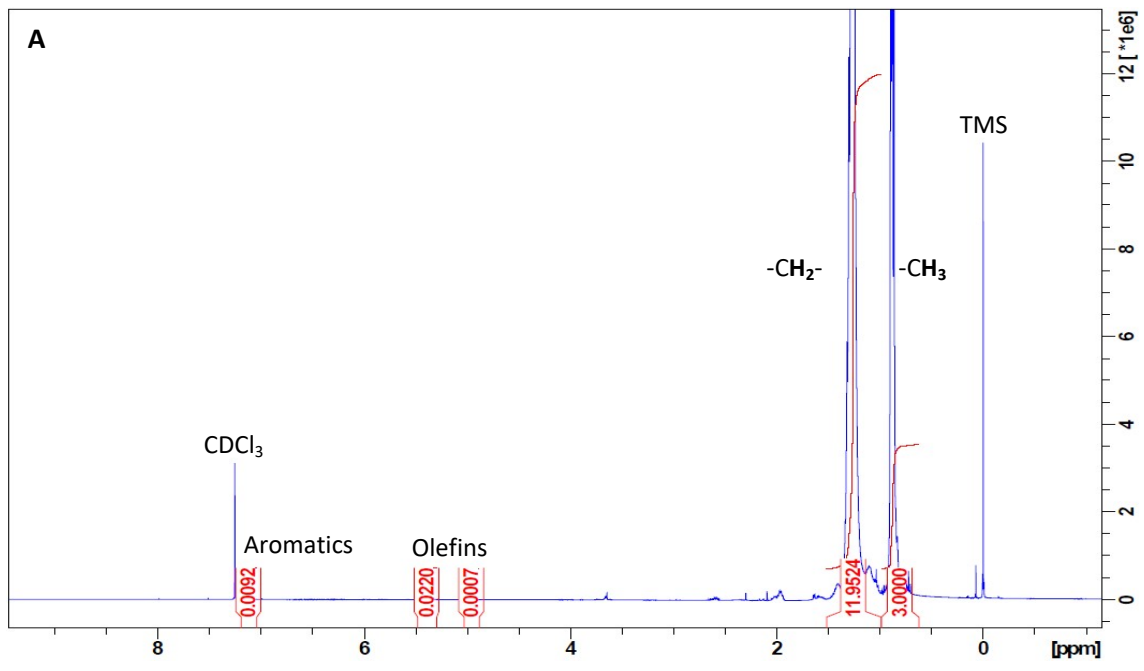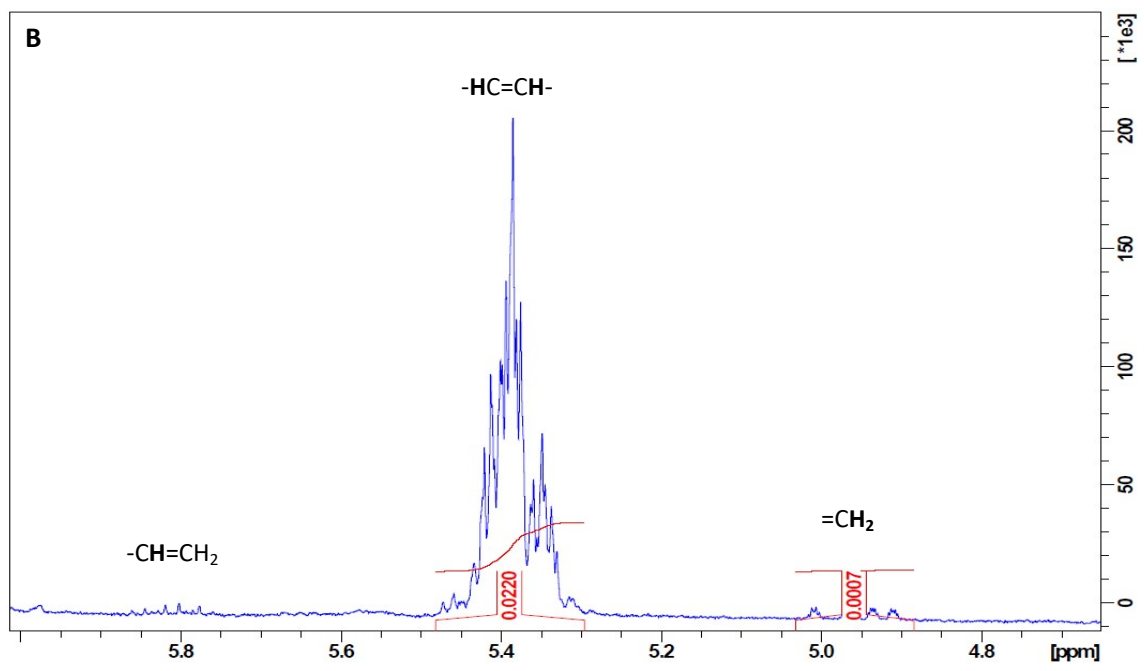

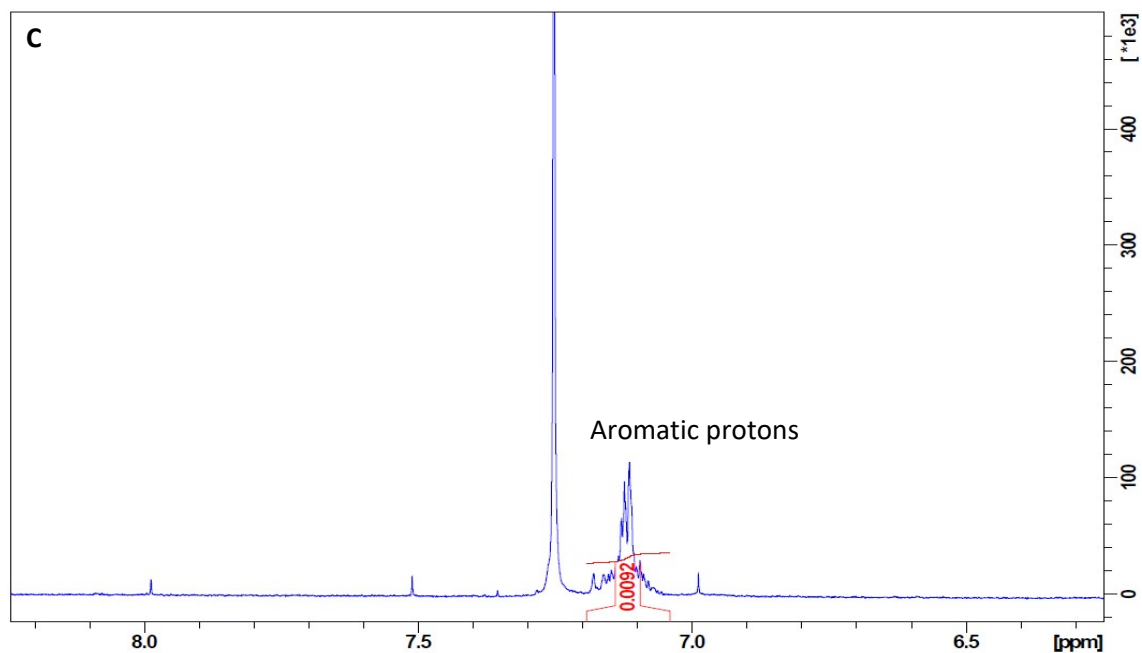

**Figure S4:** <sup>1</sup>H-NMR spectrum of partially dehydrogenated n-tetradecane (Bruker Avance 400 MHz, zg30 pulse program, CDCl<sub>3</sub>, relative to TMS). Reaction conditions: 0.25mmol Pt in 10 ml n-tetradecane, 250°C, 22h, 1 bar ethylene at start **A**) Full spectrum with peak integration: olefin yield 2.2% internal + 0.07% terminal (GC yield 2.3%), aromatics yield 0.46% (GC yield 0.5%) **B**) Spectrum zoomed in to olefin region (4.6-6 ppm) **C**) Spectrum zoomed in to aromatic region (6.5-8 ppm)

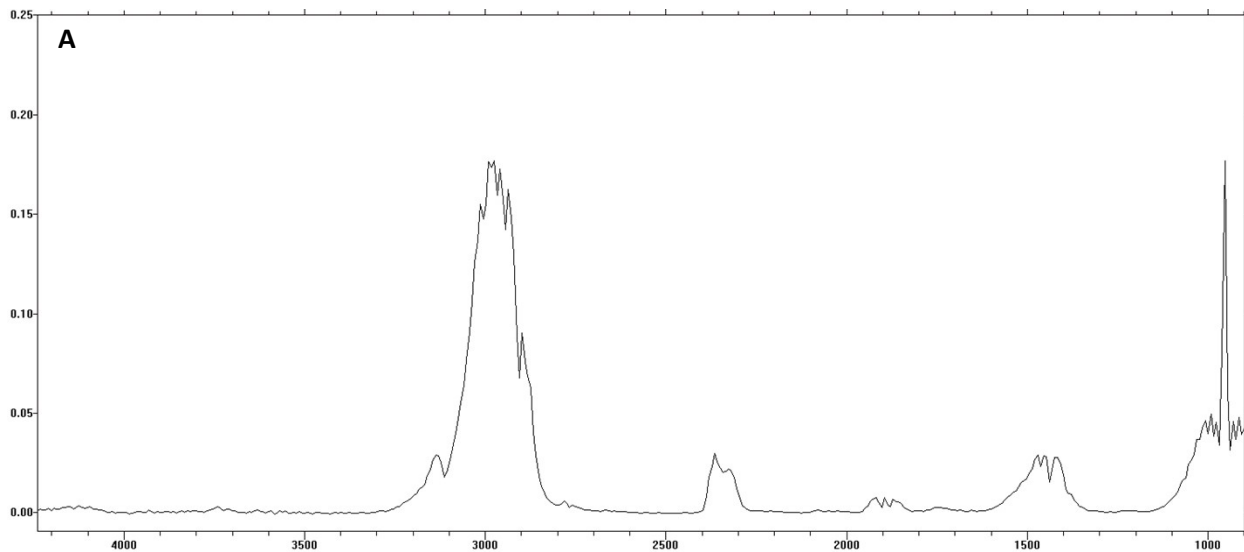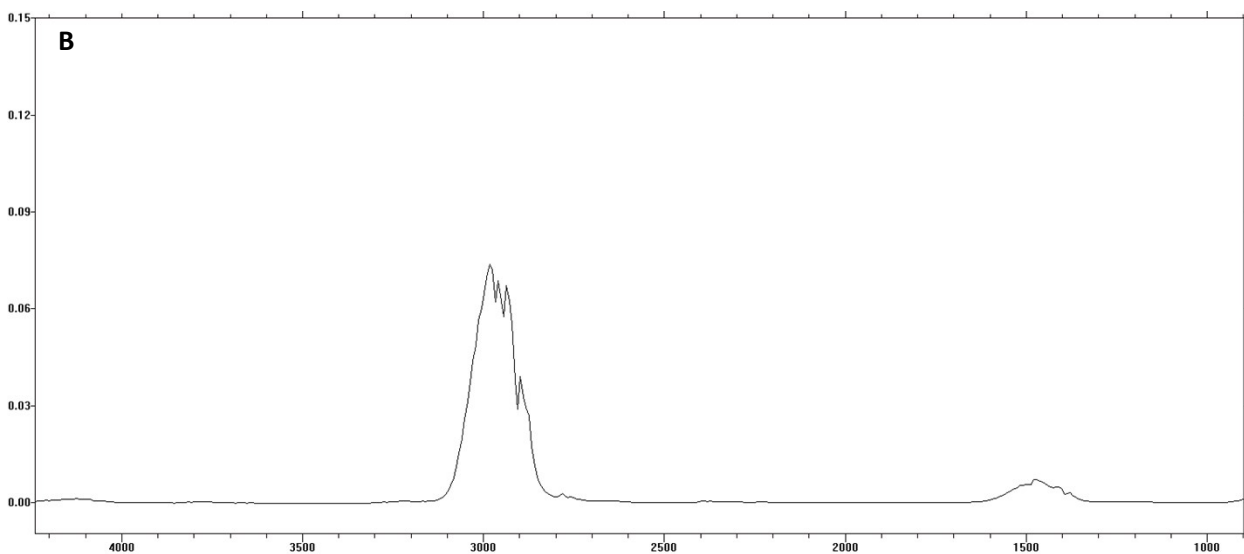



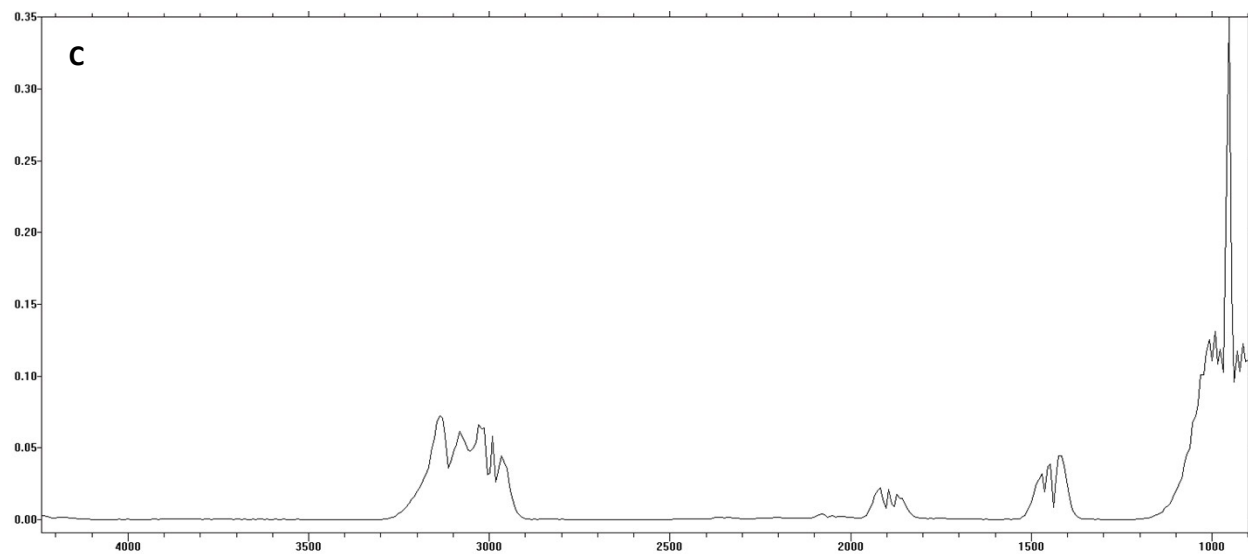

**Figure S5:** Gas phase FTIR spectra, Gaset DX4000 FTIR analyzer **A)** Gas phase sample (55% ethane/45% ethylene). Peak at 2300-2400  $\text{cm}^{-1}$  corresponds to  $\text{CO}_2$  introduced during sample injection, not present in reactor. **B)** Reference (100% ethane). **C)** reference (100% ethylene)

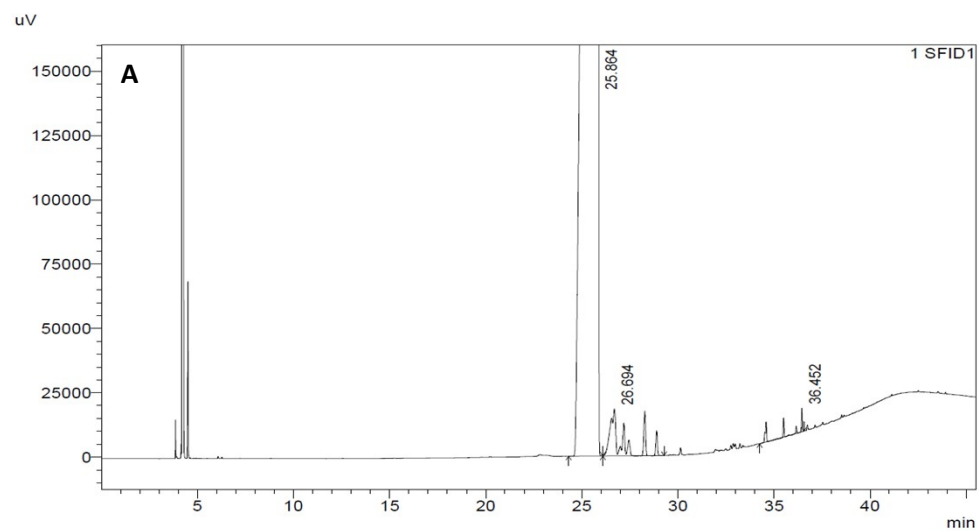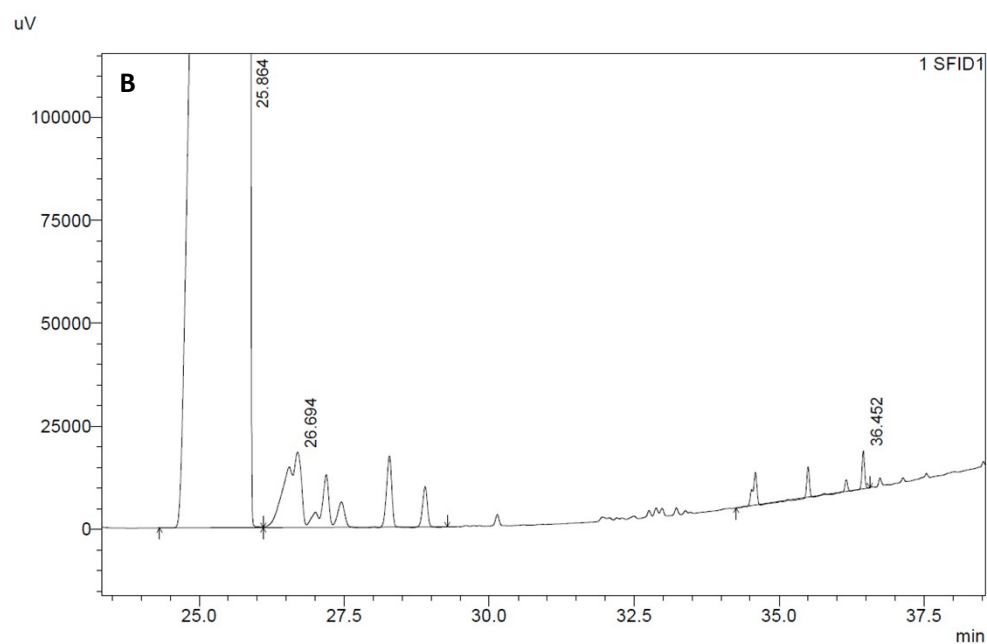

**Figure S6:** Typical gas chromatogram of partially dehydrogenated tetradecane, diluted in heptane. DB-FFAP column. **A)** Full chromatogram. **B)** Chromatogram zoomed in to relevant region. 25.8 min: tetradecane; 26.7 min: tetradecenes; 36.5 min:  $C_{14}$ -alkylaromatics; 30.2 min: *n*-pentadecane; 32.5 min: tetradecadienes (not quantified)

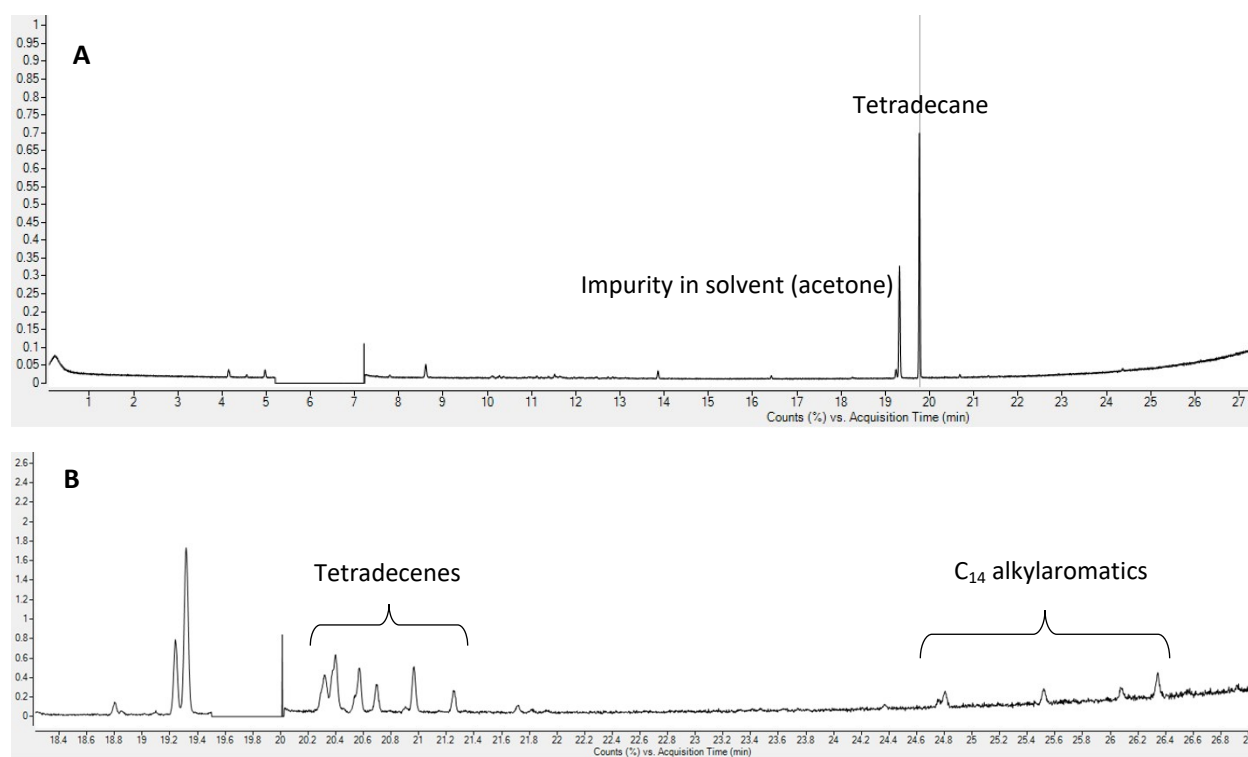

**Figure S7:** Typical GC-MS chromatogram of partially dehydrogenated tetradecane diluted in acetone, VF-WAXms column, 40°C for 5 minutes, then 10°C/min ramp to 230°C, hold at 230°C for 2.5 minutes. **A)** 50 ppm sample in acetone **B)** 5000 ppm sample in acetone, detector turned off during tetradecane elution. Zoomed in to relevant region.

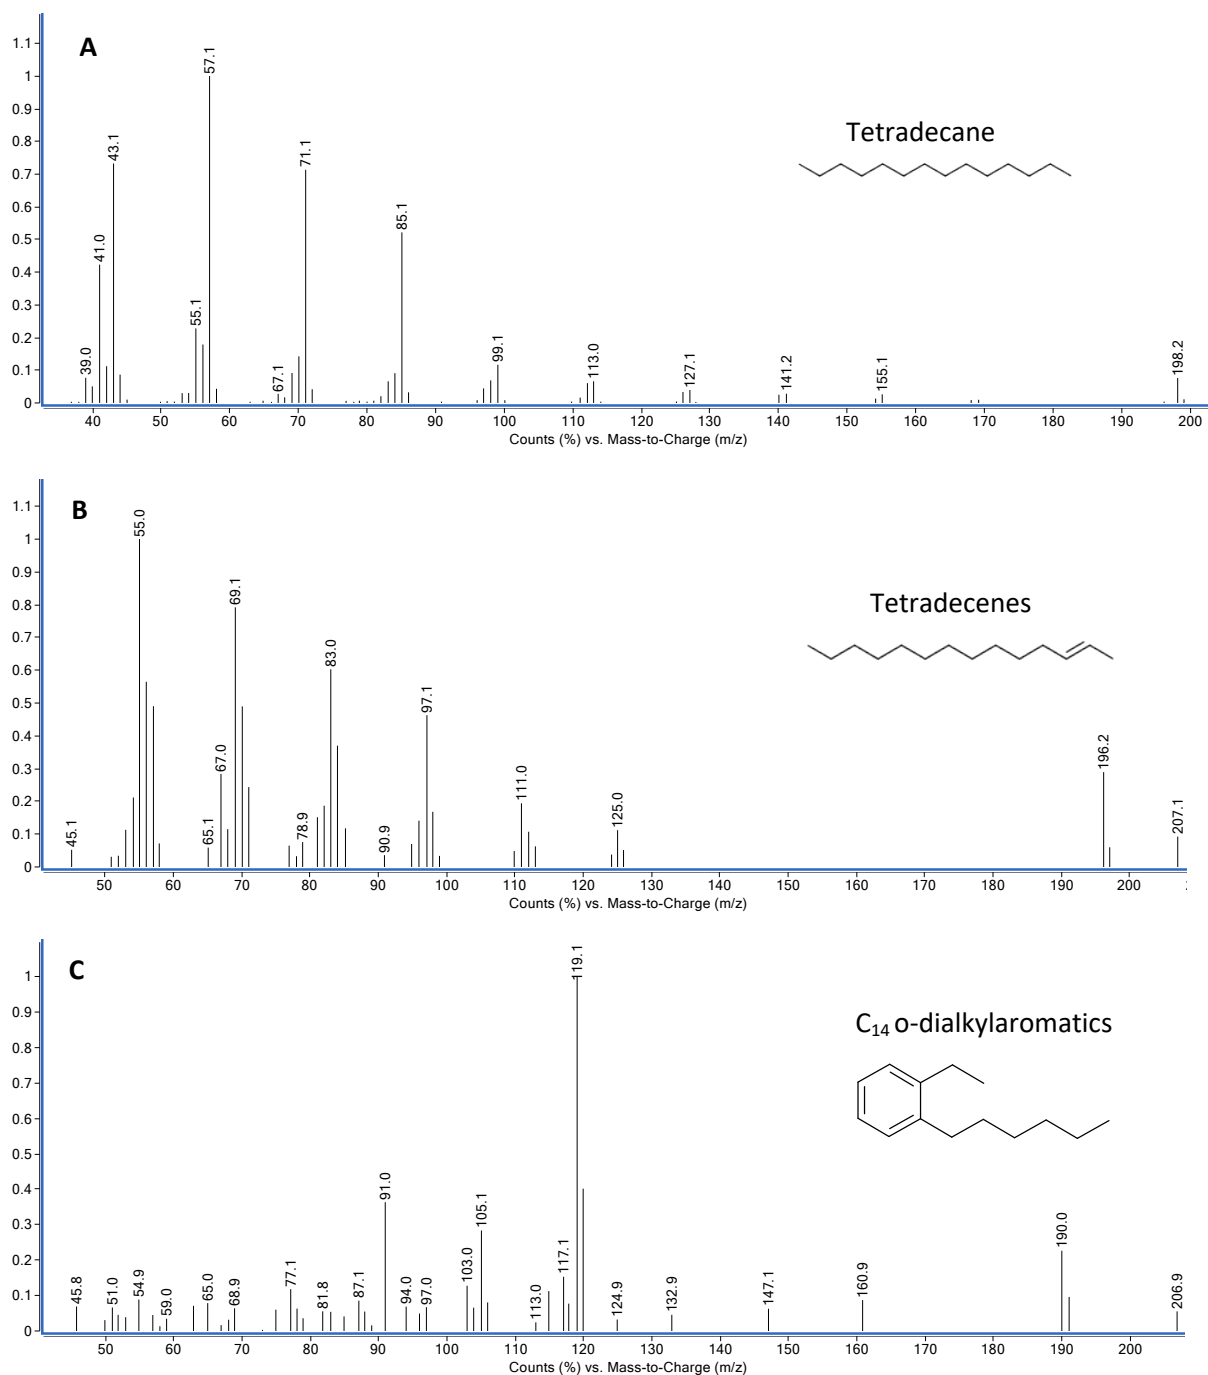

**Figure S8:** MS spectra of relevant compounds. **A)** Tetradecane (19.8 min, Figure S3). **B)** Tetradecene (20.4 min, Figure S3), all peaks in the region 20.2-21.4 min show similar MS spectra, no distinction between isomers was possible. **C)**  $C_{14}$  alkylaromatic (25.5 min, Figure S3), other peaks in the region 24.5-26.5 min show spectra with similar ions in different distributions, all consistent with  $C_{14}$  aromatic compounds.
